# Supplementary material for: Mutation in Irf8 Gene (Irf8R294C ) Impairs Type I IFN-Mediated Antiviral Immune Response by Murine pDCs
Source: PubMed Central journal article supplement (PMC8635750; doi:10.3389/fimmu.2021.758190), 2021-11-17
Supplement: DataSheet_1.pdf [file DataSheet_1.pdf]

# Supplementary Figure 1

(A)

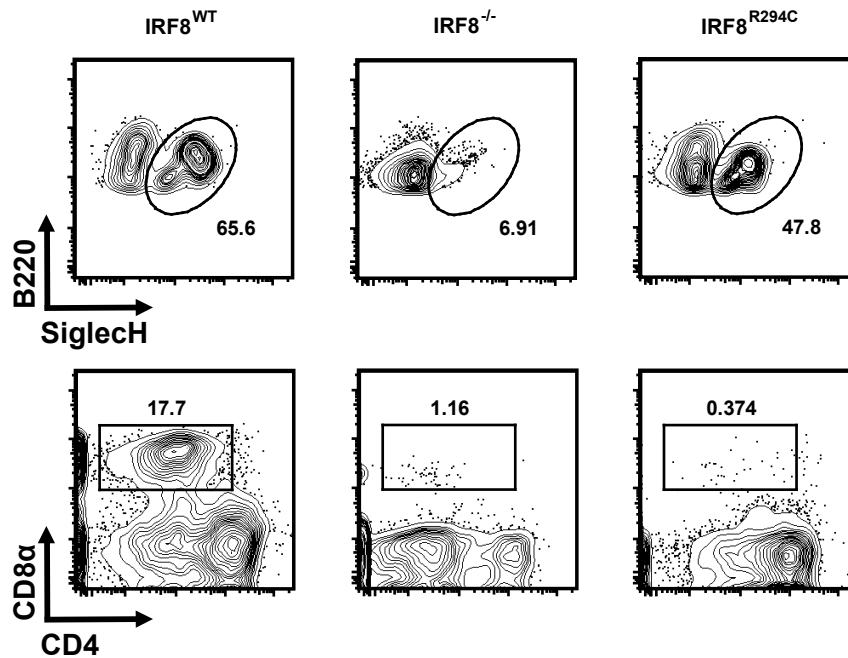

(B)

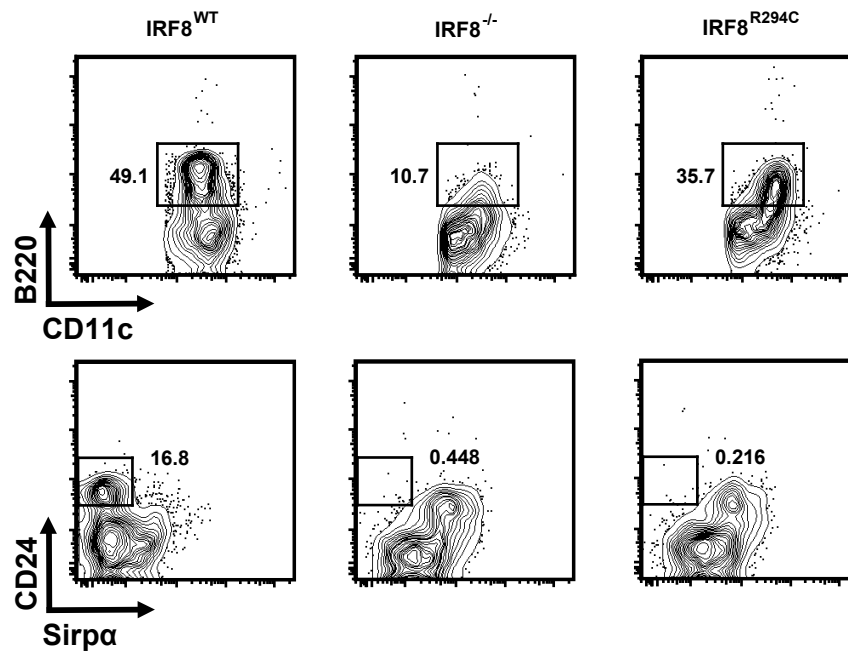

(C)

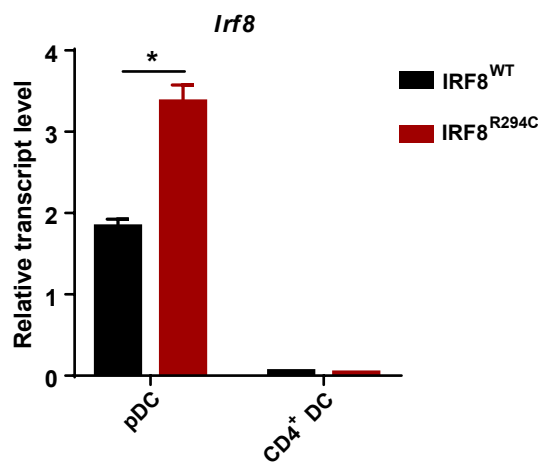

**Supplementary figure 1. *Irf8*<sup>R294C</sup> mutation selectively abrogates cDC1 development.** (A) Flow cytometric analysis of splenic DC subsets depicts the absence of CD11c<sup>+</sup>B220<sup>+</sup>SiglecH<sup>+</sup> pDCs (analysed in live and CD11c<sup>+</sup>B220<sup>+</sup> gate) in IRF8<sup>-/-</sup> and CD11c<sup>+</sup>B220<sup>-</sup>CD8α<sup>-</sup>CD4<sup>-</sup> cDC1s (analysed in live and CD11c<sup>+</sup>B220<sup>-</sup> gate) in both IRF8<sup>-/-</sup> and IRF8<sup>R294C</sup> mice. (B) Characterisation of FLDC cultures exhibit the absence of CD11c<sup>+</sup>B220<sup>+</sup> pDCs (analysed in live and CD11c<sup>+</sup> gate) in IRF8<sup>-/-</sup> and abrogation of CD11c<sup>+</sup>B220<sup>-</sup>CD24<sup>+</sup>Sirpα<sup>-</sup> cDC1s (analysed in live and CD11c<sup>+</sup>B220<sup>-</sup> gate) in both IRF8<sup>-/-</sup> and IRF8<sup>R294C</sup> mice. (C) qRT-PCR analysis of *Irf8* transcript in splenic CD11c<sup>+</sup>B220<sup>+</sup> pDCs and CD11c<sup>+</sup>B220<sup>-</sup>CD8α<sup>-</sup>CD4<sup>+</sup> DCs (CD4<sup>+</sup> DC) show increased level of *Irf8* transcript in IRF8<sup>R294C</sup> pDCs in comparison to IRF8<sup>WT</sup>. Data is representative of two independent experiments with error bar representing + SEM and \*p<0.05. p value obtained from Student's t test. Data (A,B) are representative of three independent experiments.
