# Supplementary material for: Mutation in Irf8 Gene (Irf8R294C ) Impairs Type I IFN-Mediated Antiviral Immune Response by Murine pDCs
Source: PubMed Central journal article supplement (PMC8635750; doi:10.3389/fimmu.2021.758190), 2021-11-17
Supplement: DataSheet_2.pdf [file DataSheet_2.pdf]

# Supplementary Figure 2

(A)

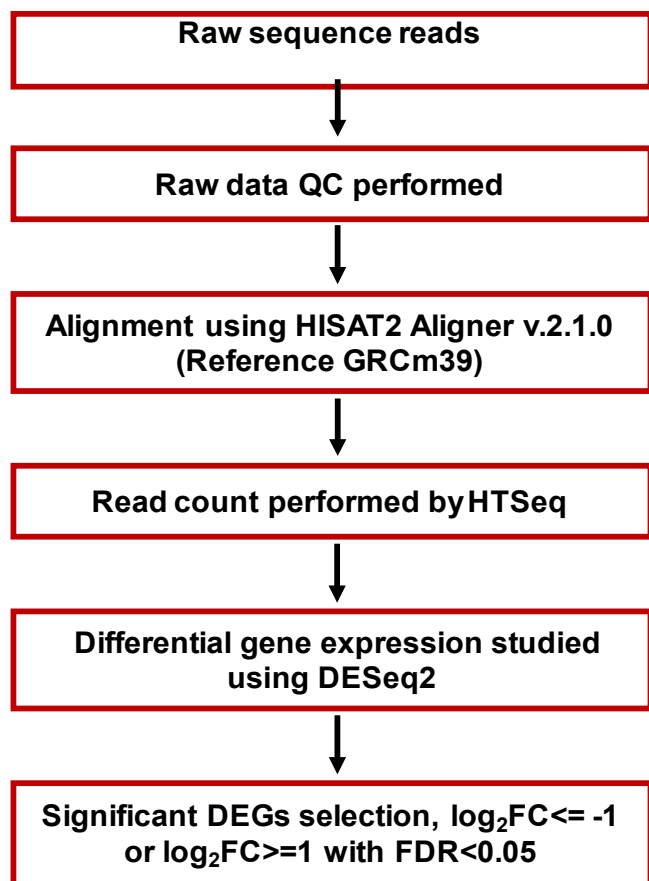

(B)

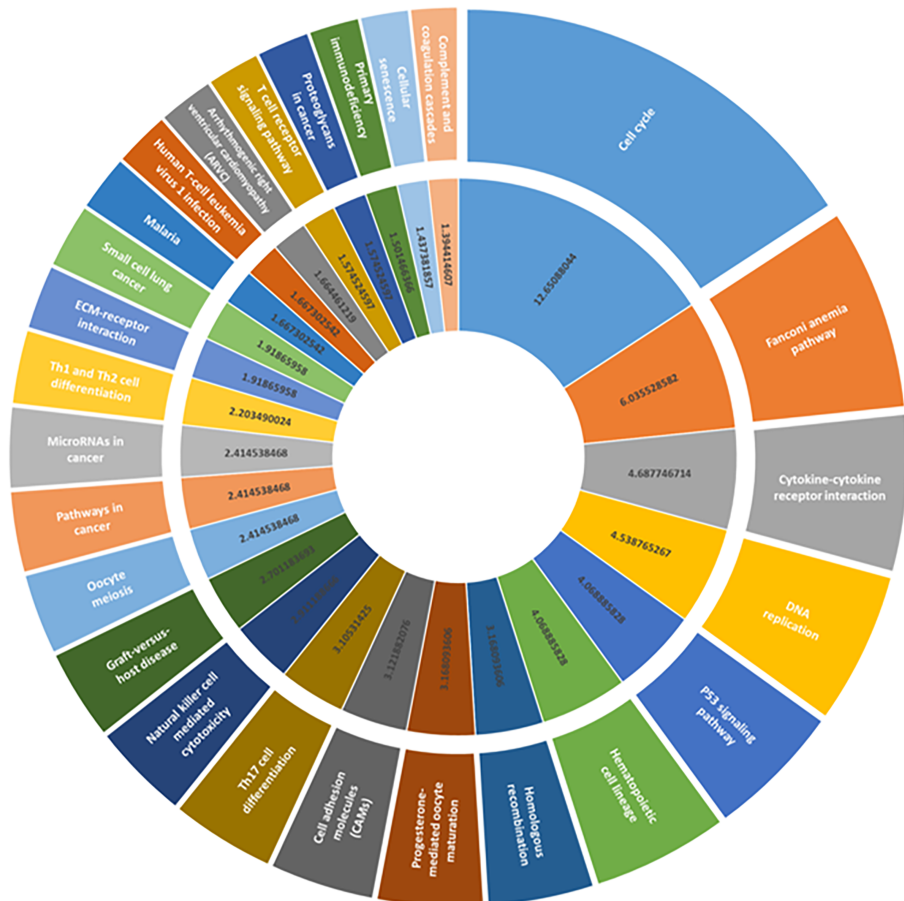

(C)

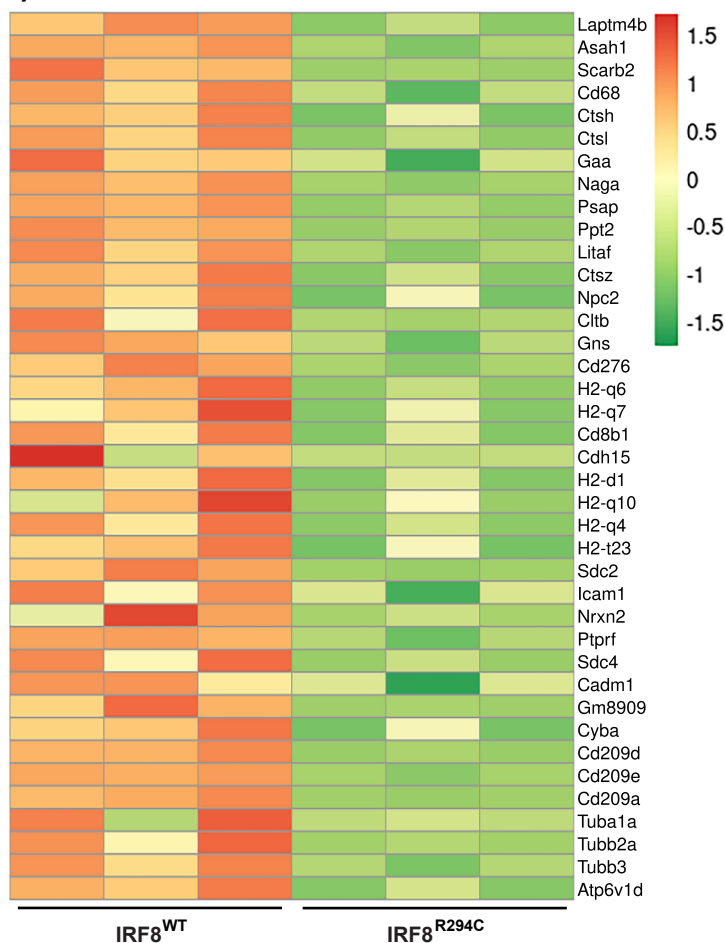

(D)

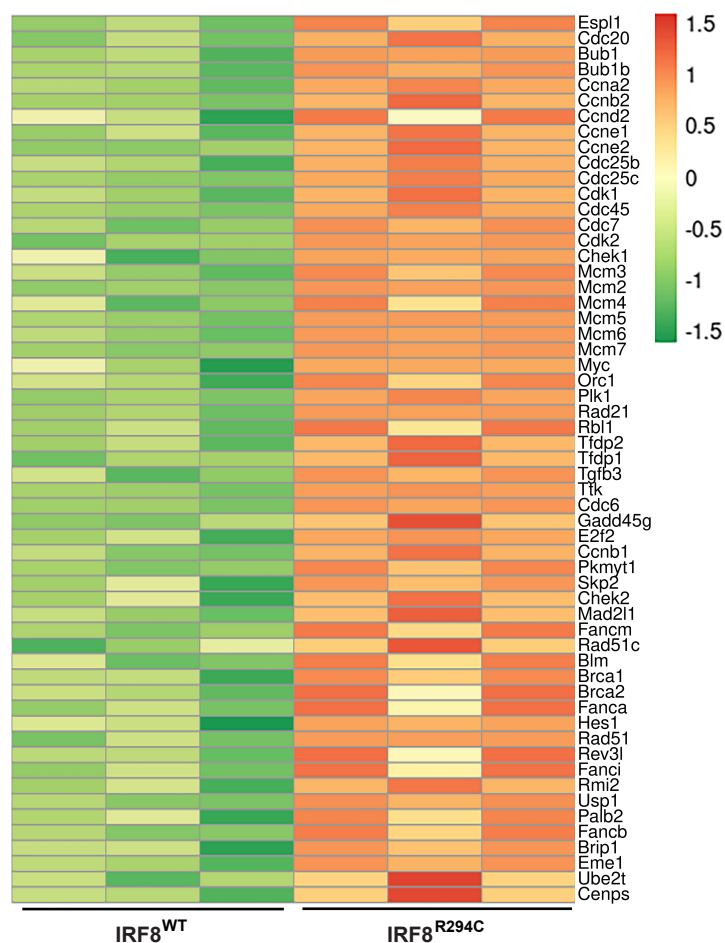

**Supplementary figure 2.** *Irf8*<sup>R294C</sup> mutation leads to changes in transcriptome of pDC. (A) Schematic depicting workflow for RNA-seq data analysis. (B) KEGG pathway analysis of downregulated genes in IRF8<sup>WT</sup>, outer circle represents top downregulated pathways in IRF8<sup>WT</sup> and inner circle indicates corresponding  $-\log_{10}$  FDR value of respective KEGG pathway. Heatmaps depicting (C) upregulated and (D) downregulated genes in IRF8<sup>WT</sup> pDCs enriched in KEGG pathway with red and green denoting up and downregulation respectively.
