# Supplementary material for: Mutation in Irf8 Gene (Irf8R294C ) Impairs Type I IFN-Mediated Antiviral Immune Response by Murine pDCs
Source: PubMed Central journal article supplement (PMC8635750; doi:10.3389/fimmu.2021.758190), 2021-11-17
Supplement: DataSheet_3.pdf [file DataSheet_3.pdf]

## Supplementary Figure 3

A

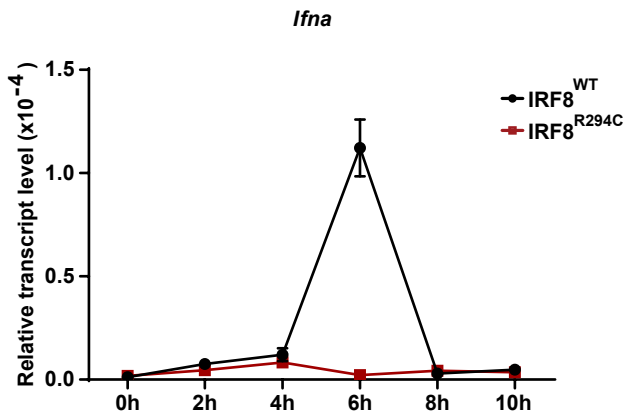

B

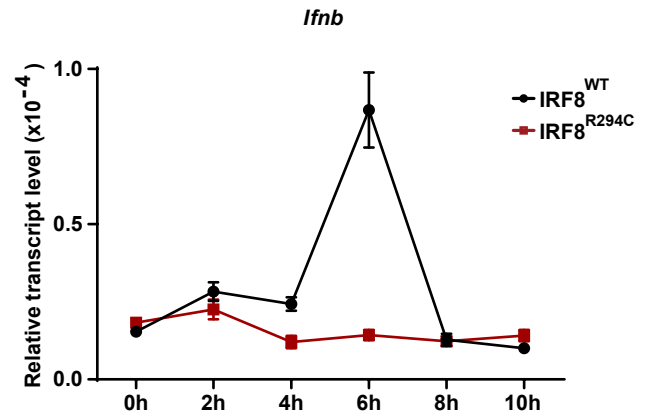

**Supplementary figure 3.** *Irf8*<sup>R294C</sup> mutation impairs type I IFN production upon NDV infection in HEK293T cells. HEK293T cells stably expressing IRF8<sup>WT</sup> or IRF8<sup>R294C</sup> separately were infected with NDV for indicated time points and transcript levels of (A) *Ifna* and (B) *Ifnb* were analysed through qRT-PCR. Data are representative of three independent experiments with error bar representing  $\pm$  standard error of mean (SEM).
