# Supplementary material for: Mutation in Irf8 Gene (Irf8R294C ) Impairs Type I IFN-Mediated Antiviral Immune Response by Murine pDCs
Source: PubMed Central journal article supplement (PMC8635750; doi:10.3389/fimmu.2021.758190), 2021-11-17
Supplement: DataSheet_4.pdf [file DataSheet_4.pdf]

## Supplementary Figure 4

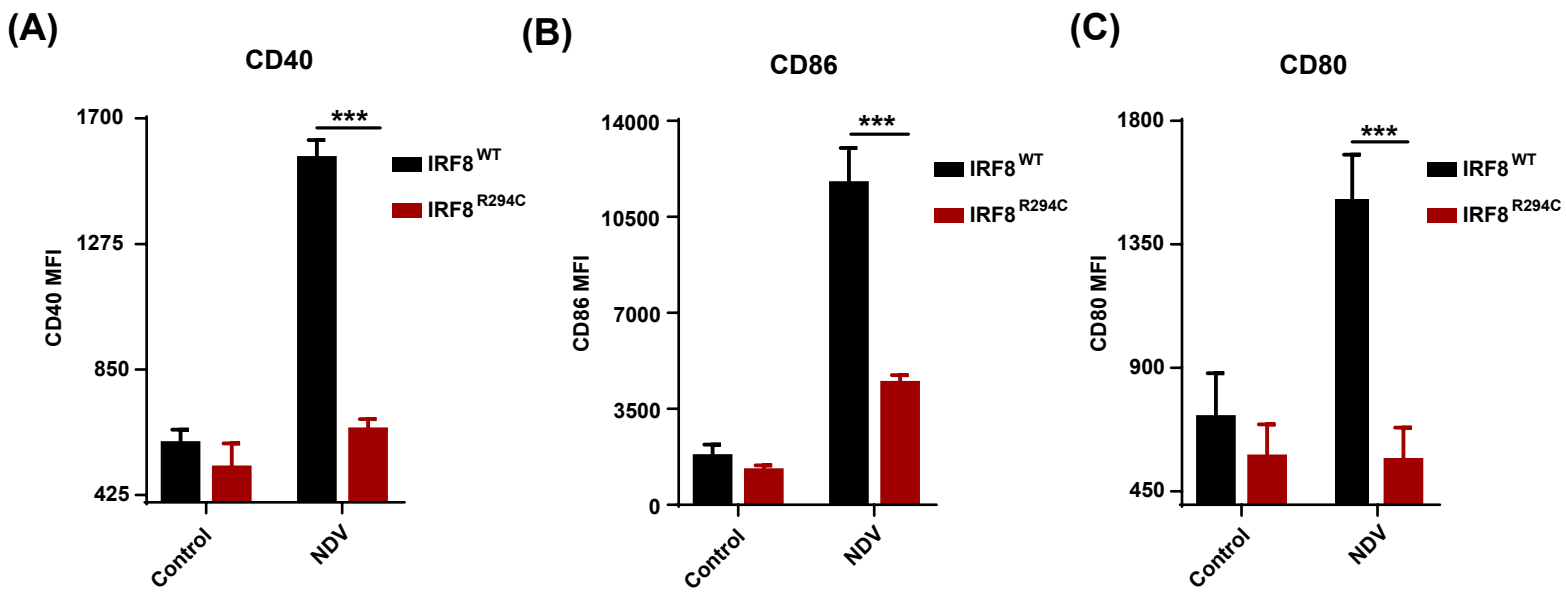

**Supplementary figure 4. Splenic pDCs from IRF8<sup>R294C</sup> mice are defective in upregulation of costimulatory molecules.** Quantitation of MFI of (A) CD40, (B) CD86 and (C) CD80 in splenic CD11c<sup>+</sup>SiglecH<sup>+</sup> pDCs from control or NDV infected IRF8<sup>WT</sup> and IRF8<sup>R294C</sup> mice as described in Figure 6. Data (A-C) shown are mean value with error bar representing + SEM and \*\*\* p < 0.001 (n = 6 mice per group).
