# Supplementary material for: Mutation in Irf8 Gene (Irf8R294C ) Impairs Type I IFN-Mediated Antiviral Immune Response by Murine pDCs
Source: PubMed Central journal article supplement (PMC8635750; doi:10.3389/fimmu.2021.758190), 2021-11-17
Supplement: Table_1.pdf [file Table_1.pdf]

## Supplementary table-1

| Gene         | Primer sequence (5'- 3')                                      | Gene         | Primer sequence (5'- 3')                                     |
|--------------|---------------------------------------------------------------|--------------|--------------------------------------------------------------|
| <i>Irf8</i>  | 5'-AGGTGACCCGGAAGCTGTTT-3'<br>5'-CTTGCGGTTGCTGTGCAGTA-3'      | <i>Oas1g</i> | 5'-CTGGGTCATGGTAGTATCAAT-3'<br>5'-CCAGGGAGGTACATTCCCA-3'     |
| <i>Gapdh</i> | 5'-GTGTTCTACCCCCAATGT-3'<br>5'-TGTCATCATACTTGGCAGGTTTC-3'     | <i>Oas1a</i> | 5'-CTGGGTCATGTTAATACTTCC-3'<br>5'-CCAGGGAGGTACATTCTC-3'      |
| <i>Ifna</i>  | 5'-CCTGAGARAGAAGAAACACAG-3'<br>5'-CTCTCCAGAYTTCTGCTCTG-3'     | <i>Oas12</i> | 5'-GCCCCAGAGGGACTGGAA-3'<br>5'-CCCGAAAGAACCTCTCGATTCT-3'     |
| <i>Ifnb</i>  | 5'-GCTCCTGGAGCAGCTGAATG -3'<br>5'-CGTCATCTCCATAGGGATCTTGA-3'  | <i>Ifi3</i>  | 5'-AGGATGGCAGAACTGAGACGAT-3'<br>5'-TTCGCCTCCTCTGAAGAGTCTT-3' |
| <i>Irf7</i>  | 5'-GAAGAGGCTGGAAGACCAACTTC-3'<br>5'-GAATTGTCTTGGCGCAAGATAA-3' | <i>Oas2</i>  | 5'-ATGTCCTTCCCGCCTATGATG-3'<br>5'-CGGGCCTGAGGGTGAAGT-3'      |
| <i>Oas3</i>  | 5'-CAGGCCCTTGAAGACAACAAAG-3'<br>5'-TTGGAAGGTTTTTGGCTCCTT-3'   | <i>NDV</i>   | 5'-GGAGGATGTTGGCAGCATT-3'<br>5'-GTCAACATATACACCTCATC-3'      |

**Supplementary table-1:** List of primers used for qRT-PCR.
